# Supplementary material
Source: ML conference proceedings conference paper supplement (https://openaccess.thecvf.com/content/CVPR2024/html/Qiao_Making_Visual_Sense_CVPR_2024_paper.html)
Supplement: Supplementary file 1 [file Qiao_Making_Visual_Sense_CVPR_2024_supplemental.pdf]

# Supplementary: Making Visual Sense of Oracle Bones for You and Me

## 1. Task-Specific Prompts

Fig. 1 displays the prompts utilised in “Textual Contextualisation” with GPT-4V [5]. This includes a detailed task description, in-context examples, and an input oracle character. The purpose of the task description is to aid the  $\Psi$  model in accurately grasping the objective of the task and establishing the format for inputs and outputs. Additionally, the in-context examples are instrumental in reinforcing task-specific linguistic styles, appropriate use of terminology, and conventional reasoning patterns.

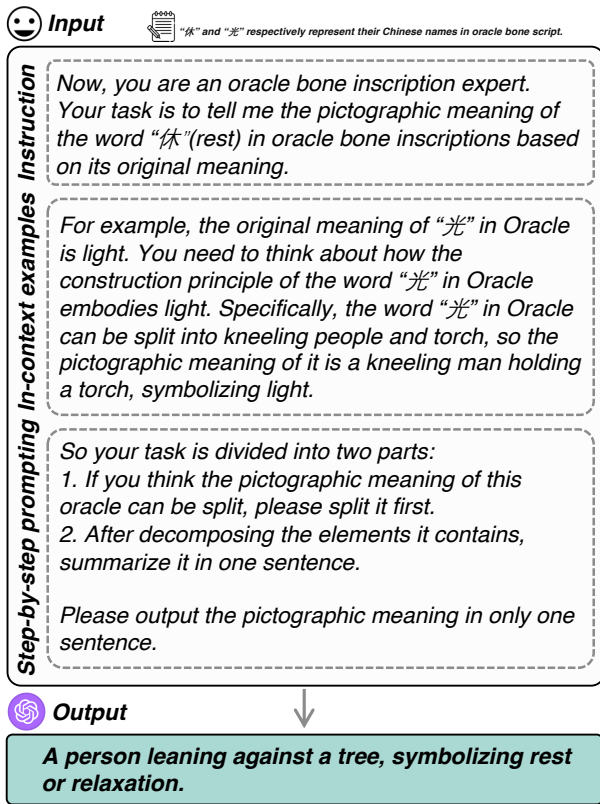

Figure 1. The prompt utilised in “Textual Contextualisation”

Fig. 2 displays the prompts employed in “Visual Constraints” for  $L_i^v$  generation with QWEN-VL [2], which aims to activate the object localisation capability of  $\Psi$ .

Fig. 3 illustrates the prompt used to acquire  $L_i^t$ s with [5],

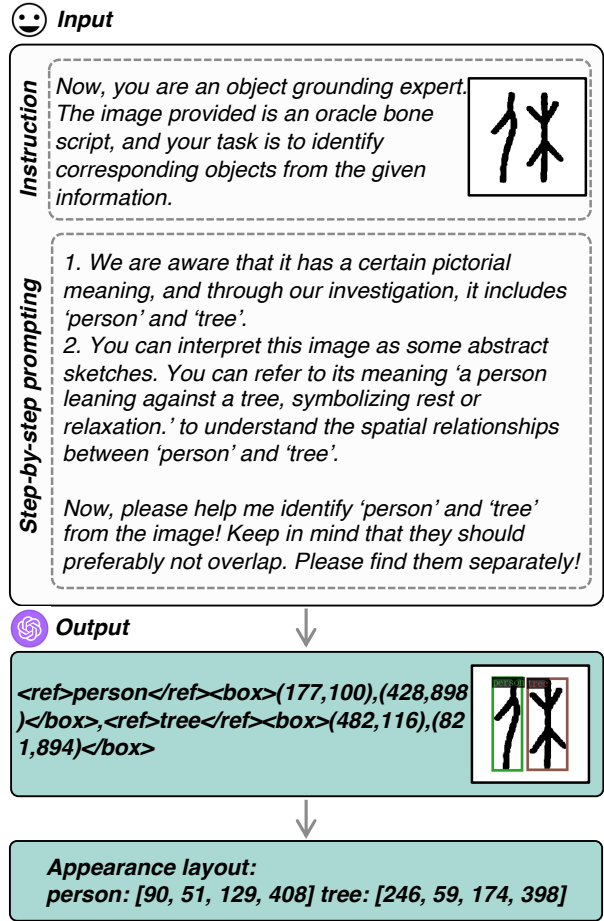

Figure 2. The prompt employed in “Visual Constraints”

aiming to trigger the spatial analysis from textual inputs in the  $\Psi$  inspired by [4, 6].

Similarly, Fig. 4 displays the prompt employed to derive  $L_i$  with [5], designed to stimulate the multimodal spatial analysis and visual understanding capabilities of  $\Psi$  when processing multiple visual inputs.

## 2. Visual guides of Human Study

Fig. 5 illustrates examples of 28 visual guides of  $o_i$  used in human study. The diversity in these guides results from the collected data from the website [1], varying input con-

**Input**

**Instruction**  
 Now, you are an intelligent bounding box generator. I will provide you with a caption and your task is to generate the bounding boxes for the objects mentioned in the caption.

**Step-by-step prompting**  
 Your task can be divided into mining objects first and then generating bounding boxes.  
 1. In the part of mining objects:  
 You need to determine which objects are indispensable for understanding this caption, and you only need to retain these objects, and keep the number of control objects as small as possible. For example, when you find an inclusion relationship between elements mentioned in this caption, please only keep that element that covers other elements.  
 2. In the part of generating bounding:  
 You need to note that the images are of size 512x512, and the bounding boxes should not go beyond the image boundaries. Each bounding box should be in the format of (object name, [top-left x coordinate, top-left y coordinate, box width, box height]) and include exactly one object. Make the boxes larger if possible. You can make reasonable guesses. The layout you design should be as diverse as possible in terms of positioning. For example, among 10 groups of layouts, the positional relationships between multiple objects should be diverse, and the exchange of left and right positions or up and down positions should be fully covered.

Please refer to this caption combined with your imagination, and give me with ten layout generations based on different conjectures that you think are correct.

Caption: a person leaning against a tree, symbolizing rest or relaxation.  
 The format of the answer is :< Layout n: object 1: [x1, y1, w1, h1] object 2: [x2, y2, w2, h2] object n: [x3, y3, w3, h3] >

**Output**

**Layout 1:**  
 person: [100, 200, 100, 300] tree: [50, 50, 100, 450]  
**Layout 2:**  
 person: [300, 200, 100, 300] tree: [400, 50, 100, 450]  
**Layout 3:**  
 person: [150, 150, 100, 300] tree: [200, 0, 100, 512]  
**Layout 4:**  
 person: [200, 150, 100, 300] tree: [0, 0, 100, 512]  
**Layout 5:**  
 person: [100, 100, 100, 300] tree: [300, 100, 100, 400]  
**Layout 6:**  
 person: [312, 212, 100, 300] tree: [212, 12, 100, 500]  
**Layout 7:**  
 person: [400, 300, 100, 200] tree: [250, 50, 150, 462]  
**Layout 8:**  
 person: [50, 300, 100, 200] tree: [300, 60, 150, 452]  
**Layout 9:**  
 person: [256, 256, 100, 256] tree: [156, 0, 100, 512]  
**Layout 10:**  
 person: [412, 156, 100, 356] tree: [12, 156, 100, 356]

Figure 3. The prompt used to acquire  $L_i^t$ s

**Input**

**Instruction**  
 Now, you are a layout selection expert. Your task is to choose the one closest to the appearance layout from 10 semantic layouts.

**Step-by-step prompting**  
 There are three aspects that require your attention.  
 1. Please note that appearance layout is highly abstract and all you need to refer to is the relative relationship between its objects. And the format of Layout is [x1,y1,w,h].  
 2. Please consider the positional layout relationship between the objects first, and then we will provide you with the caption describing these layouts. You can consider whether it aligns with this caption's semantics.  
 3. Please provide the best layout directly from the semantic layouts without explanations.

The format of the answer is < Layout X: object1: [x1, y1, w1, h1] object2: [x2, y2, w2, h2] objectn: [x3, y3, w3, h3] >  
 caption: a person leaning against a tree.

**Layouts**  
 Appearance layout:  
 person: [90, 51, 129, 408] tree: [246, 59, 174, 398]  
 Semantic layouts:  
 Layout 1:  
 person: [100, 200, 100, 300] tree: [50, 50, 100, 450]  
 Layout 2:  
 person: [300, 200, 100, 300] tree: [400, 50, 100, 450]  
 Layout 3:  
 person: [150, 150, 100, 300] tree: [200, 0, 100, 512]  
 Layout 4:  
 person: [200, 150, 100, 300] tree: [0, 0, 100, 512]  
 Layout 5:  
 person: [100, 100, 100, 300] tree: [300, 100, 100, 400]  
 Layout 6:  
 person: [312, 212, 100, 300] tree: [212, 12, 100, 500]  
 Layout 7:  
 person: [400, 300, 100, 200] tree: [250, 50, 150, 462]  
 Layout 8:  
 person: [50, 300, 100, 200] tree: [300, 60, 150, 452]  
 Layout 9:  
 person: [256, 256, 100, 256] tree: [156, 0, 100, 512]  
 Layout 10:  
 person: [412, 156, 100, 356] tree: [12, 156, 100, 356]

**Output**

**Layout 3:**  
 person: [150, 150, 100, 300] tree: [200, 0, 100, 512]

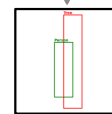

Figure 4. The prompt employed to derive  $L_i$

ditions, and model[7] parameters.

### 3. The reliability of TransOV

To ensure the reliability of the model, we divide it into two steps: (i) We measure the model calibration by Ex-

| Dep. | Wid. | BN | Acc.(↑) | Spec.(↑) | ECE(↓) | MCE(↓) | Dep. | Wid. | BN | Acc.(↑) | Spec.(↑) | ECE(↓) | MCE(↓) |
|------|------|----|---------|----------|--------|--------|------|------|----|---------|----------|--------|--------|
| 2    | 64   | ✓  | 86.00%  | 86.06%   | 0.24   | 0.27   | 2    | 128  | ✓  | 81.50%  | 79.21%   | 0.25   | 0.28   |
| 3    | 64   | ✓  | 84.25%  | 85.93%   | 0.25   | 0.27   | 3    | 128  | ✓  | 83.25%  | 79.90%   | 0.28   | 0.29   |
| 2    | 64   |    | 54.00%  | 55.00%   | 0.46   | 0.48   | 3    | 64   |    | 52.25%  | 53.37%   | 0.45   | 0.48   |

Table 1. Ablation of network structure of *TransOV*.

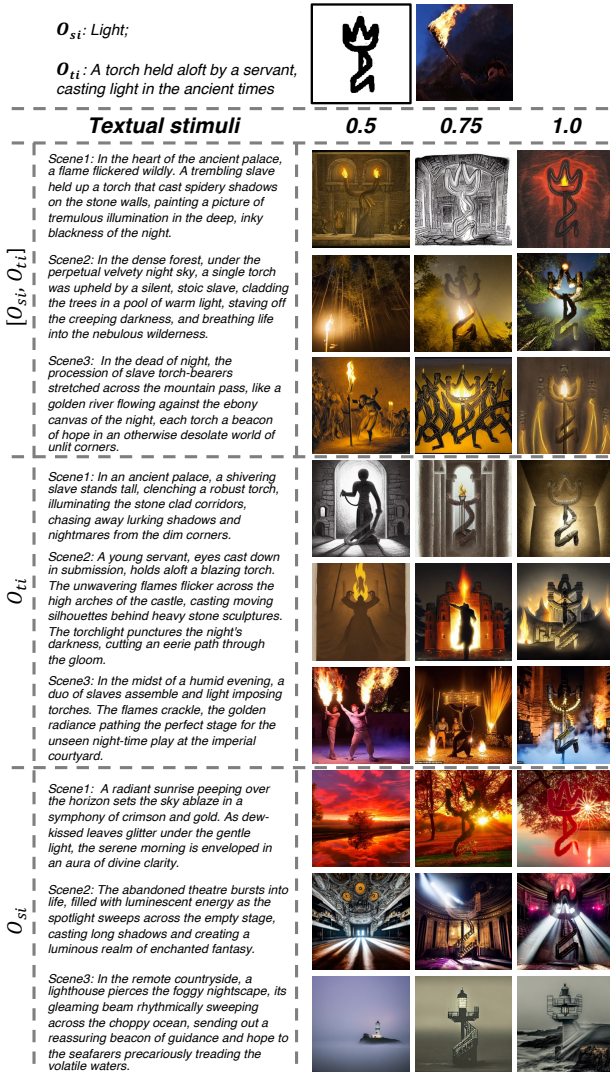

Figure 5. Examples of 28 visual guides

pected Calibration Error (ECE) and Maximum Calibration Error (MCE) with 10 bins [3]. We conducted a series of experiments about three factors of network: depth, width, and batch normalisation. This helped us identify a network structure with comparable reliability, as detailed in Tab.1. (ii) To further remedy the miscalibration, we utilise Platt-scaling, an effective parametric approach to calibration. This approach notably decreased ECE (0.24  $\rightarrow$  0.19) and MCE (0.27  $\rightarrow$  0.21), albeit at the cost of a slight de-

crease of accuracy (86.00%  $\rightarrow$  84.75%) and specificity (86.06%  $\rightarrow$  85.71%). We hold that the reliability of the model is paramount, making this trade-off justifiable (Fig.6).

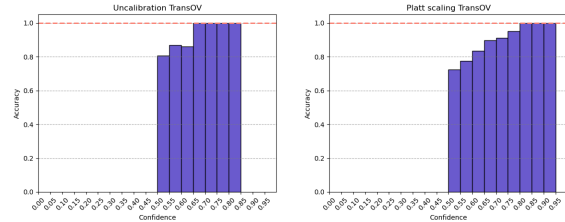

Figure 6. Reliability diagrams of *TransOV* before and after calibration

#### 4. An example of Guide Finalisation

Fig. 7 illustrates an example in “Guide Finalisation”. For oracle “light”, the objects extracted from  $t_i$  are “person” and “torch”. We locate the visual patches corresponding to “person” and “torch” in  $o_{gi}$  and  $v_i^k$ s respectively, and calculate  $R_i^k$  via Eq.1. The x-axis in the figure corresponds to  $R_i^k$  for “person”, and the y-axis for “torch”. Notably, the range of variation for “person” is much larger than for “torch”. Consequently, “person” is selected as the key object for the final selection. The image highlighted with a red frame is identified as the final visual guide.

$$R_i^k = Sim(p_{oi}, p_{vi}^k) \quad (1)$$

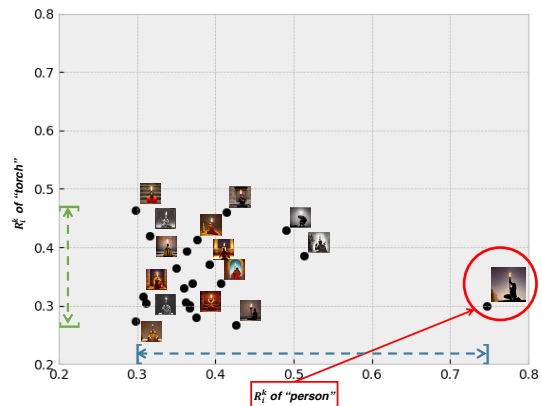

Figure 7. An example in “Guide Finalisation”

## References

- [1] Dictionary. <https://www.vividict.com>. 1
- [2] Jinze Bai, Shuai Bai, Shusheng Yang, Shijie Wang, Sinan Tan, Peng Wang, Junyang Lin, Chang Zhou, and Jingren Zhou. Qwen-vl: A versatile vision-language model for understanding, localization, text reading, and beyond. *arXiv preprint arXiv:2308.12966*, 2023. 1
- [3] Chuan Guo, Geoff Pleiss, Yu Sun, and Kilian Q Weinberger. On calibration of modern neural networks. In *ICML, 2017*. 3
- [4] Long Lian, Boyi Li, Adam Yala, and Trevor Darrell. Llm-grounded diffusion: Enhancing prompt understanding of text-to-image diffusion models with large language models. *arXiv preprint arXiv:2305.13655*, 2023. 1
- [5] OpenAI. Gpt-4v(ision) system card. *openai.com*, 2023. 1
- [6] Leigang Qu, Shengqiong Wu, Hao Fei, Liqiang Nie, and Tat-Seng Chua. Layoutllm-t2i: Eliciting layout guidance from llm for text-to-image generation. In *ACM MM, 2023*. 1
- [7] Lvmin Zhang, Anyi Rao, and Maneesh Agrawala. Adding conditional control to text-to-image diffusion models. In *ICCV, 2023*. 2
